# Supplementary material
Source: publisher site journal article supplement (https://subtbiol.pensoft.net/article/66755/download/suppl/310/)
Supplement: Supplementary file 1

## Sheet: SuppTable2
nr	CHX	CHY	SubBio_lab_Voucher	Altermatt_lab_ID	Day	Month	Year	Nr_Ind	Latitude	Longitude	Species	Genbank_accession_number
7	588518	209959	NC942	NI130	27	2	2019	5	47.0406	7.28756	Niphargus auerbachi	MW721667
8	588518	209959	NC943	NI131	6	3	2019	1	47.0406	7.28756	NA	NA
9	588518	209959	NC944	NI132	20	3	2019	9	47.0406	7.28756	Niphargus arolaensis sp. nov.	MW721668
10	588518	209959	NC945	NI133	25	4	2019	2	47.0406	7.28756	Niphargus arolaensis sp. nov.	MW721669
10	588518	209959	NC946	NI133	25	4	2019	2	47.0406	7.28756	NA	NA
12	588518	209959	NC947	NI134	17	4	2019	3	47.0406	7.28756	Niphargus arolaensis sp. nov.	MW721670
13	588518	209959	NC948	NI134	17	4	2019	3	47.0406	7.28756	Niphargus auerbachi	MW721671
14	588518	209959	NC949	NI135	16	5	2019	1	47.0406	7.28756	Niphargus sp. Leuzigen	MW721672
15	588518	209959	NC950	NI136	2	5	2019	4	47.0406	7.28756	NA	NA
16	588518	209959	NC951	NI137	9	5	2019	5	47.0406	7.28756	Niphargus arolaensis sp. nov.	MW721773
17	588518	209959	NC952	NI137	9	5	2019	5	47.0406	7.28756	Niphargus sp. Leuzigen	MW721673
18	588518	209959	NC953	NI138	5	6	2019	1	47.0406	7.28756	Niphargus sp. Leuzigen	MW721674
19	757142	251511	NC954	NI139	8	5	2019	2	47.3957	9.52034	Niphargus luchoffmanni	MW721675
20	683432	225673	NC955	NI140	10	5	2019	3	47.1767	8.53926	Niphargus luchoffmanni	MW721676
21	711002	246634	NC956	NI141	14	5	2019	6	47.3612	8.90807	Niphargus auerbachi	MW721677
22	711002	246634	NC957	NI141	14	5	2019	6	47.3612	8.90807	Niphargus tonywhitteni	MW721678
23	706668	249271	NC958	NI142	21	5	2019	1	47.3856	8.85134	Niphargus tonywhitteni	MW721679
24	706668	249271	NC959	NI143	21	5	2019	4	47.3856	8.85134	Niphargus auerbachi	MW721767
25	706668	249271	NC960	NI143	21	5	2019	4	47.3856	8.85134	Niphargus tonywhitteni	MW721680
26	711002	246634	NC961	NI144	28	5	2019	5	47.3612	8.90807	Niphargus auerbachi	NA
27	711002	246634	NC962	NI144	28	5	2019	5	47.3612	8.90807	Niphargus fontanus A	MW721681
28	706668	249271	NC963	NI145	14	5	2019	1	47.3856	8.85134	Niphargus tonywhitteni	MW721682
29	689992	113447	NC964	NI146	29	5	2019	1	46.1665	8.60381	Niphargus sp. Borgnone	MW721683
30	675539	259424	NC965	NI147	6	5	2019	1	47.4812	8.44084	Niphargus auerbachi	MW721684
31	675572	258301	NC966	NI148	6	5	2019	2	47.4711	8.44108	Niphargus fontanus A	MW721685
32	692287	239885	NC967	NI149	4	6	2019	2	47.3034	8.65898	Niphargus luchoffmanni	MW721686
33	694702	237760	NC968	NI150	4	6	2019	4	47.2839	8.69046	Niphargus tonywhitteni	MW721774
34	692287	239885	NC969	NI151	29	6	2019	3	47.3034	8.65898	Niphargus luchoffmanni	MW721687
35	692287	239885	NC970	NI151	29	6	2019	3	47.3034	8.65898	Niphargus luchoffmanni	MW721688
36	693176	238851	NC971	NI152	4	6	2019	5	47.294	8.67051	Niphargus luchoffmanni	MW721689
37	694702	237760	NC972	NI153	29	6	2019	5	47.2839	8.69046	Niphargus luchoffmanni	MW721690
38	693176	238851	NC973	NI154	29	6	2019	22	47.294	8.67051	Niphargus luchoffmanni	MW721691
39	658229	244703	NC974	NI155	28	5	2019	2	47.3506	8.20928	Niphargus arolaensis sp. nov.	MW721692
40	615802	258021	NC975	NI156	10	4	2019	1	47.4728	7.64825	Niphargus fontanus A	MW721693
41	642998	259301	NC976	NI157	18	4	2019	4	47.4831	8.00911	Niphargus tonywhitteni	MW721694
42	611630	254094	NC977	NI158	29	4	2019	2	47.4375	7.5928	Niphargus rhenorhodanensis H	MW721695
43	708869	240319	NC978	NI159	10	5	2019	1	47.3048	8.87831	Niphargus fontanus A	MW721696
44	709034	238746	NC979	NI160	31	5	2019	1	47.2906	8.88011	Niphargus thienemanni	MW721768
45	708640	240033	NC980	NI161	10	5	2019	4	47.3022	8.87521	Niphargus tonywhitteni	MW721697
46	708869	240319	NC981	NI162	10	5	2019	7	47.3048	8.87831	Niphargus fontanus A	MW721698
47	619675	180288	NC982	NI163	5	7	2019	2	46.7735	7.69624	Niphargus luchoffmanni	MW721699
48	619190	180304	NC983	NI164	5	7	2019	1	46.7736	7.68989	Niphargus luchoffmanni	MW721769
49	698653	254113	NC984	NI165	3	5	2019	1	47.4304	8.74627	Niphargus tonywhitteni	MW721700
50	699537	256064	NC985	NI166	15	5	2019	1	47.4478	8.75842	Niphargus fontanus A	MW721701
51	698653	254113	NC986	NI167	23	5	2019	3	47.4304	8.74627	Niphargus tonywhitteni	MW721702
52	642989	241085	NC987	NI168	28	5	2019	1	47.3192	8.00724	Niphargus arolaensis sp. nov.	MW721703
53	643934	240180	NC988	NI169	28	5	2019	5	47.311	8.01965	Niphargus thienemanni	MW721704
54	642989	241085	NC989	NI170	28	5	2019	2	47.3192	8.00724	Niphargus arolaensis sp. nov.	MW721705
55	643934	240180	NC990	NI171	28	5	2019	1	47.311	8.01965	Niphargus thienemanni	MW721706
56	721624	204587	NC991	NI172	8	5	2019	3	46.9812	9.03731	Niphargus thienemanni	MW721707
57	721624	204587	NC992	NI173	8	5	2019	2	46.9812	9.03731	Niphargus thienemanni	MW721708
58	602632	224651	NC993	NI174	9	5	2019	22	47.1728	7.47335	Niphargus sp. Leuzigen	MW721709
59	602437	224637	NC994	NI175	16	5	2019	2	47.1727	7.47078	Niphargus auerbachi	MW721710
60	602632	224651	NC995	NI176	2	5	2019	4	47.1728	7.47335	Niphargus sp. Leuzigen	MW721711
61	602390	224641	NC996	NI177	16	5	2019	1	47.1727	7.47016	Niphargus sp. Leuzigen	MW721712
62	686768	259876	NC997	NI178	6	5	2019	1	47.4839	8.58988	Niphargus fontanus A	MW721713
63	686768	259876	NC998	NI179	13	5	2019	1	47.4839	8.58988	Niphargus auerbachi	MW721770
64	626919	223734	NC999	NI180	8	5	2019	1	47.164	7.79365	Niphargus tonywhitteni	MW721714
65	692286	238545	ND001	NI181	23	5	2019	1	47.2913	8.65869	Niphargus luchoffmanni	MW721715
66	690498	238415	ND002	NI182	23	5	2019	1	47.2904	8.63503	NA	NA
67	667988	267883	ND003	NI183	27	5	2019	1	47.5581	8.34195	Niphargus puteanus	MW721716
68	605663	198362	ND004	NI184	10	5	2019	1	46.9363	7.51301	NA	NA
69	671320	264570	ND005	NI185	6	5	2019	1	47.528	8.38569	Niphargus fontanus A	MW721717
70	671320	264570	ND006	NI186	21	5	2019	1	47.528	8.38569	Niphargus fontanus A	MW721718
71	623764	249122	ND007	NI187	27	5	2019	22	47.3925	7.75339	Niphargus fontanus A	MW721719
72	623764	249122	ND008	NI188	13	5	2019	1	47.3925	7.75339	Niphargus fontanus A	MW721720
73	623764	249122	ND009	NI189	13	5	2019	5	47.3925	7.75339	NA	NA
74	623764	249122	ND010	NI190	3	6	2019	4	47.3925	7.75339	Niphargus tonywhitteni	MW721721
75	623764	249122	ND011	NI191	17	6	2019	7	47.3925	7.75339	Niphargus fontanus A	MW721722
76	623764	249122	ND012	NI192	12	6	2019	1	47.3925	7.75339	Niphargus kieferi	MW721723
77	623764	249122	ND013	NI193	3	6	2019	1	47.3925	7.75339	Niphargus tonywhitteni	MW721724
78	636690	264565	ND014	NI194	8	5	2019	1	47.5308	7.92586	Niphargus fontanus A	MW721725
79	674907	236786	ND015	NI195	23	5	2019	4	47.2777	8.42866	Niphargus auerbachi	MW721726
80	674792	236905	ND016	NI196	23	5	2019	5	47.2788	8.42716	Niphargus rhenorhodanensis JK	MW721727
81	674907	236786	ND017	NI197	23	5	2019	1	47.2777	8.42866	Niphargus rhenorhodanensis JK	MW721728
82	674792	236905	ND018	NI198	23	5	2019	3	47.2788	8.42716	Niphargus rhenorhodanensis JK	MW721729
83	628860	233082	ND019	NI199	15	5	2019	3	47.248	7.81985	Niphargus tonywhitteni	MW721730
84	750877	213725	ND020	NI200	20	5	2019	1	47.0574	9.42471	Niphargus luchoffmanni	MW721731
85	676677	248847	ND021	NI201	16	5	2019	1	47.386	8.45412	Niphargus luchoffmanni	MW721732
86	676234	249763	ND022	NI202	23	5	2019	1	47.3943	8.44841	Niphargus tonywhitteni	MW721733
87	676049	249286	ND023	NI203	31	5	2019	1	47.39	8.44588	Niphargus thienemanni	MW721734
88	676677	248847	ND024	NI204	23	5	2019	1	47.386	8.45412	Niphargus luchoffmanni	MW721735
89	676234	249763	ND025	NI205	16	5	2019	1	47.3943	8.44841	Niphargus tonywhitteni	MW721736
90	676049	249286	ND026	NI206	23	5	2019	1	47.39	8.44588	Niphargus thienemanni	MW721737
91	676049	249286	ND027	NI207	16	5	2019	1	47.39	8.44588	Niphargus thienemanni	MW721738
92	674293	261895	ND028	NI208	24	4	2019	4	47.5036	8.42472	Niphargus fontanus A	MW721739
93	641604	224644	ND029	NI209	31	5	2019	1	47.1715	7.98741	Niphargus fontanus A	MW721740
94	601256	229405	ND030	NI210	3	5	2019	1	47.2156	7.45522	Niphargus tonywhitteni	MW721741
95	639397	250375	ND031	NI211	15	4	2019	4	47.403	7.96055	Niphargus fontanus A	MW721742
96	639397	250375	ND032	NI211	15	4	2019	4	47.403	7.96055	Niphargus puteanus	MW721743
97	639397	250375	ND033	NI212	29	4	2019	1	47.403	7.96055	Niphargus fontanus A	MW721744
98	674910	253509	ND034	NI213	22	5	2019	1	47.4281	8.4315	Niphargus fontanus A	MW721745
99	674949	252838	ND035	NI214	22	5	2019	4	47.4221	8.4319	Niphargus fontanus A	MW721746
100	612282	187053	ND036	NI215	9	5	2019	4	46.8345	7.59963	Niphargus luchoffmanni	MW721747
101	612282	187053	ND037	NI215	9	5	2019	4	46.8345	7.59963	Niphargus auerbachi	MW721748
102	632815	264357	ND038	NI216	1	5	2019	1	47.5291	7.87439	Niphargus puteanus	MW721749
103	632815	264357	ND039	NI217	1	5	2019	1	47.5291	7.87439	Niphargus puteanus	MW721750
104	632396	263798	ND040	NI218	8	5	2019	3	47.5241	7.86878	Niphargus fontanus A	MW721751
105	632815	264357	ND041	NI219	1	5	2019	7	47.5291	7.87439	Niphargus puteanus	MW721752
106	627297	254090	ND042	NI220	24	6	2019	2	47.437	7.80048	Niphargus puteanus	MW721753
107	627297	254090	ND043	NI220	24	6	2019	2	47.437	7.80048	Niphargus tonywhitteni	MW721771
108	627137	253730	ND044	NI221	28	5	2019	1	47.4338	7.79834	Niphargus tonywhitteni	MW721754
109	627297	254090	ND045	NI222	27	5	2019	5	47.437	7.80048	Niphargus fontanus A	MW721755
110	633979	263641	ND046	NI223	8	5	2019	1	47.5226	7.88979	Niphargus fontanus A	MW721756
1	705550	255353	ND047	NI124	6	6	2019	1	47.4405	8.83797	Niphargus auerbachi	MW721772
2	707777	248423	ND048	NI125	6	6	2019	1	47.3778	8.86582	Niphargus tonywhitteni	MW721757
3	804943	174884	ND049	NI126	6	9	2018	1	46.6937	10.1185	NA	NA
4	804943	174884	ND050	NI127	10	9	2018	1	46.6937	10.1185	Niphargus cf. thienemanni	NA
6	805170	174718	ND052	NI129	10	9	2018	1	46.6921	10.1214	Niphargus cf. thienemanni	NA
111	749553	238250	ND453	NI224	31	7	2019	4	47.2782	9.41543	Niphargus luchoffmanni	MW721758
112	749553	238250	ND454	NI225	31	7	2019	1	47.2782	9.41543	Niphargus sp. Ebenalp	MW721759
114	749553	238250	ND455	NI227	5	8	2019	4	47.2782	9.41543	Niphargus sp. Ebenalp	MW721760
113	750096	242307	ND456	NI226	2	8	2019	13	47.3145	9.42396	Niphargus luchoffmanni	MW721761
115	754571	243275	ND457	NI228	6	8	2019	6	47.3222	9.48346	NA	NA
116	755184	242280	ND458	NI229	6	8	2019	5	47.3131	9.49122	Niphargus luchoffmanni	MW721762
117	754163	242938	ND459	NI230	6	8	2019	3	47.3193	9.47794	Niphargus luchoffmanni	MW721763
118	609671	165189	ND460	NI231	15	7	2019	1	46.6379	7.56494	Niphargus luchoffmanni	MW721764
119	607569	165622	ND461	NI232	19	8	2019	1	46.6418	7.53751	Niphargus luchoffmanni	MW721765
120	816350	170230	ND462	NI233	16	7	2019	1	46.6482	10.2653	Niphargus cf. thienemanni 1	MW721766
